# Supplementary material for: Body Mass Index Is Inversely Associated with Risk of Postmenopausal Interval Breast Cancer: Results from the Women’s Health Initiative
Source: MDPI journal article supplement (doi:10.3390/cancers14133228), 2022-06-30
Supplement: s1 [file s1]

**Table S1.** Association of BMI (categorical variable) and interval breast cancer diagnosed within 1 year after last normal mammogram screening compared to screening-detected breast cancers .

|                                                                            | Odds Ratio               |                          |                          |                          |                          |                          |
|----------------------------------------------------------------------------|--------------------------|--------------------------|--------------------------|--------------------------|--------------------------|--------------------------|
|                                                                            | Model 1                  | Model 2                  | Model 3                  | Model 4                  | Model 5 <sup>a</sup>     | Model 6 <sup>a</sup>     |
| <b>BMI Categories</b>                                                      |                          |                          |                          |                          |                          |                          |
| Underweight (BMI <18.5)                                                    | 1.16 (0.24, 5.53)        | 1.14 (0.24, 5.47)        | 1.15 (0.24, 5.49)        | 1.13 (0.24, 5.43)        | 0.98 (0.20, 4.81)        | 0.95 (0.19, 4.70)        |
| Normal weight (BMI:18.5-24.9)                                              | 1.00 (Ref)               |
| Overweight (BMI: >24.9-29.9)                                               | 0.86 (0.64, 1.16)        | 0.88 (0.65, 1.198)       | 0.88 (0.66, 1.20)        | 0.89 (0.66, 1.21)        | 0.93 (0.69, 1.27)        | 0.91 (0.67, 1.24)        |
| Obese (BMI > 29.9)                                                         | <b>0.55 (0.41, 0.75)</b> | <b>0.57 (0.41, 0.80)</b> | <b>0.58 (0.42, 0.81)</b> | <b>0.60 (0.43, 0.84)</b> | <b>0.65 (0.46, 0.92)</b> | <b>0.62 (0.43, 0.89)</b> |
| <b>Covariates</b>                                                          |                          |                          |                          |                          |                          |                          |
| Waist-to-hip ratio                                                         |                          | 0.57 (0.10, 3.31)        | 0.54 (0.09, 3.18)        | 0.53 (0.09, 3.13)        | 0.52 (0.09, 3.15)        | 0.60 (0.10, 3.72)        |
| Gail 5-year risk                                                           |                          |                          | <b>1.11 (1.00, 1.22)</b> | <b>1.11 (1.00, 1.22)</b> | <b>1.11 (1.00, 1.22)</b> | <b>n/a</b>               |
| Total Energy intake                                                        |                          |                          |                          | 1.00 (1.00, 1.00)        | 1.00 (1.00, 1.00)        | 1.00 (1.00, 1.00)        |
| Total energy expended from recreational physical activity (MET-hours/week) |                          |                          |                          | 1.00 (0.99, 1.01)        | 1.00 (0.99, 1.02)        | 1.00 (0.99, 1.02)        |
| Comorbidity                                                                |                          |                          |                          |                          | 1.00 (Ref)               | 1.00 (Ref)               |
| 0                                                                          |                          |                          |                          |                          | 1.05 (0.77, 1.42)        | 1.07 (0.78, 1.45)        |
| 1                                                                          |                          |                          |                          |                          | 1.12 (0.72, 1.85)        | 1.17 (0.72, 1.90)        |
| 2                                                                          |                          |                          |                          |                          | 2.09 (1.09, 4.00)        | 2.27 (1.17, 4.04)        |
| ≥3                                                                         |                          |                          |                          |                          |                          |                          |
| Age at screening                                                           |                          |                          |                          |                          |                          | 1.00 (0.98, 1.02)        |
| Race/ethnicity                                                             |                          |                          |                          |                          |                          |                          |
| White                                                                      |                          |                          |                          |                          |                          | 1.00 (Ref)               |
| African American                                                           |                          |                          |                          |                          |                          | 0.96 (0.59, 1.59)        |
| Hispanic                                                                   |                          |                          |                          |                          |                          | 2.17 (1.13, 4.17)        |
| Asian                                                                      |                          |                          |                          |                          |                          | 0.85 (0.38, 1.89)        |
| Family history of breast cancer                                            |                          |                          |                          |                          |                          |                          |
| No                                                                         |                          |                          |                          |                          |                          | 1.00 (Ref)               |
| Yes                                                                        |                          |                          |                          |                          |                          | 1.18 (0.89, 1.57)        |
| Age at first live birth                                                    |                          |                          |                          |                          |                          |                          |
| Never had any live birth                                                   |                          |                          |                          |                          |                          | 0.99 (0.45, 2.19)        |
| <20 years old                                                              |                          |                          |                          |                          |                          | 0.68 (0.43, 1.06)        |
| 20-29 years old                                                            |                          |                          |                          |                          |                          | 1.00 (Ref)               |
| ≥30 years old                                                              |                          |                          |                          |                          |                          | 1.24 (0.82, 1.90)        |
| Age at menarche, No (%)                                                    |                          |                          |                          |                          |                          |                          |
| ≤13 years old                                                              |                          |                          |                          |                          |                          | 1.00 (Ref)               |
| >13 years old                                                              |                          |                          |                          |                          |                          | <b>0.71 (0.52, 0.97)</b> |
| Previous breast biopsy, No (%)                                             |                          |                          |                          |                          |                          |                          |
| 0                                                                          |                          |                          |                          |                          |                          | 1.00 (Ref)               |
| 1                                                                          |                          |                          |                          |                          |                          | 1.16 (0.85, 1.58)        |
| >1                                                                         |                          |                          |                          |                          |                          | 1.39 (0.87, 2.20)        |

This table reports a series of sequential multivariate models where a new variable is added to each model. Numbers in cells represent the Odds Ratios and 95% confidence intervals computed from the Logistic Regression model. Model 1: Unadjusted model; Model 2: Model 1 + WHR; Model 3: Model 2 + Gail 5 year risk score; Model 4: Model 3+ total dietary energy intake and total energy from recreational physical activity; Model 5: Model 4+ for hormone replacement therapy clinical trial arm and dietary modification trial arm, smoking status, alcohol intake, education and comorbidity; Model 6: Replace Gail 5-year risk with the original variables: age, ethnicity, age at menarche, age at first full term birth, family history of breast cancer, previous breast biopsy.

**Table S2.** Association of BMI (continuous variable) and interval breast cancer diagnosed within 1 year after last normal mammogram screening compared to screening-detected breast cancers.

|                                                                            | Odds Ratio        |                   |                   |                   |                      |                      |
|----------------------------------------------------------------------------|-------------------|-------------------|-------------------|-------------------|----------------------|----------------------|
|                                                                            | Model 1           | Model 2           | Model 3           | Model 4           | Model 5 <sup>6</sup> | Model 6 <sup>7</sup> |
| <b>BMI Continuous Variables</b>                                            |                   |                   |                   |                   |                      |                      |
| Per 1 unite increase                                                       | 0.96 (0.94, 0.98) | 0.96 (0.94, 0.98) | 0.96 (0.94, 0.98) | 0.96 (0.94, 0.99) | 0.97 (0.94, 0.99)    | 0.97 (0.94, 0.99)    |
| <b>Covariates</b>                                                          |                   |                   |                   |                   |                      |                      |
| Waist-to-hip ratio                                                         |                   | 0.57 (0.10, 3.27) | 0.54 (0.09, 3.13) | 0.53 (0.09, 3.08) | 0.52 (0.09, 3.11)    | 0.57 (0.09, 3.47)    |
| Gail 5-year risk                                                           |                   |                   | 1.10 (1.00, 1.22) | 1.11 (1.00, 1.22) | 1.11 (1.00, 1.22)    | n/a                  |
| Total Energy intake                                                        |                   |                   |                   | 1.00 (1.00, 1.00) | 1.00 (1.00, 1.00)    | 1.00 (1.00, 1.00)    |
| Total energy expended from recreational physical activity (MET-hours/week) |                   |                   |                   | 1.00 (0.99, 1.01) | 1.00 (0.99, 1.02)    | 1.00 (0.99, 1.02)    |
| Comorbidity                                                                |                   |                   |                   |                   | 1.00 (Ref)           | 1.00 (Ref)           |
| 0                                                                          |                   |                   |                   |                   | 1.05 (0.77, 1.42)    | 1.07 (0.78, 1.45)    |
| 1                                                                          |                   |                   |                   |                   | 1.11 (0.69, 1.79)    | 1.15 (0.71, 1.86)    |
| 2                                                                          |                   |                   |                   |                   | 2.11 (1.10, 4.04)    | 2.33 (1.20, 4.52)    |
| ≥3                                                                         |                   |                   |                   |                   |                      |                      |
| Age at screening                                                           |                   |                   |                   |                   |                      | 1.00 (0.98, 1.02)    |
| Race/ethnicity                                                             |                   |                   |                   |                   |                      |                      |
| White                                                                      |                   |                   |                   |                   |                      | 1.00 (Ref)           |
| African American                                                           |                   |                   |                   |                   |                      | 0.96 (0.58, 1.57)    |
| Hispanic                                                                   |                   |                   |                   |                   |                      | 2.26 (1.18, 4.34)    |
| Asian                                                                      |                   |                   |                   |                   |                      | 0.82 (0.37, 1.83)    |
| Family history of breast cancer                                            |                   |                   |                   |                   |                      |                      |
| No                                                                         |                   |                   |                   |                   |                      | 1.00 (Ref)           |
| Yes                                                                        |                   |                   |                   |                   |                      | 1.17 (0.88, 1.56)    |
| Age at first live birth                                                    |                   |                   |                   |                   |                      |                      |
| Never had any live birth                                                   |                   |                   |                   |                   |                      | 0.96 (0.44, 2.12)    |
| <20 years old                                                              |                   |                   |                   |                   |                      | 0.69 (0.44, 1.08)    |
| 20-29 years old                                                            |                   |                   |                   |                   |                      | 1.00 (Ref)           |
| ≥30 years old                                                              |                   |                   |                   |                   |                      | 1.25 (0.82, 1.90)    |
| Age at menarche REDO, No (%)                                               |                   |                   |                   |                   |                      |                      |
| ≤13 years old                                                              |                   |                   |                   |                   |                      | 1.00 (Ref)           |
| >13 years old                                                              |                   |                   |                   |                   |                      | 0.72 (0.53, 0.98)    |
| Previous breast biopsy, No (%)                                             |                   |                   |                   |                   |                      |                      |
| 0                                                                          |                   |                   |                   |                   |                      | 1.00 (Ref)           |
| 1                                                                          |                   |                   |                   |                   |                      | 1.15 (0.84, 1.57)    |
| >1                                                                         |                   |                   |                   |                   |                      | 1.37 (0.86, 2.18)    |

This table reports a series of sequential multivariate models where a new variable is added to each model. Numbers in cells represent the Odds Ratios and 95% confidence intervals computed from the Logistic Regression model. Model 1: Unadjusted model; Model 2: Model 1 + WHR; Model 3: Model 2 + Gail 5 year risk score; Model 4: Model 3+ total dietary energy intake and total energy from recreational physical activity; Model 5: Model 4+ for hormone replacement therapy clinical trial arm and dietary modification trial arm, smoking status, alcohol intake, education and comorbidity; Model 6: Replace Gail 5-year risk with the original variables: age, ethnicity, age at menarche, age at first full term birth, family history of breast cancer, previous breast biopsy.

**Table S3.** Association of waist-to-hip ratio (WHR) and interval breast cancer diagnosed within 1 year after last normal mammogram screening compared to screening-detected breast cancers .

|                                 | Odds Ratio (95% Confidence Interval) <sup>1</sup> |                          |                          |                      |                      |
|---------------------------------|---------------------------------------------------|--------------------------|--------------------------|----------------------|----------------------|
|                                 | Model 1 <sup>2</sup>                              | Model 2 <sup>3</sup>     | Model 3 <sup>4</sup>     | Model 4 <sup>5</sup> | Model 5 <sup>6</sup> |
| <b>WHR Continuous Variables</b> |                                                   |                          |                          |                      |                      |
| Per 1 unite increase            | <b>0.16 (0.03, 0.84)</b>                          | <b>0.16 (0.03, 0.84)</b> | <b>0.17 (0.03, 0.90)</b> | 0.22 (0.04, 1.18)    | 0.23 (0.04, 1.27)    |

This table reports a series of sequential multivariate models where a new variable is added to each model. Numbers in cells represent the Odds Ratios and 95% confidence intervals computed from the Logistic Regression model. Model 1: Unadjusted model; Model 2: Model 1 + Gail 5 year risk score; Model 3: Model 2 + total dietary energy intake and total energy from recreational physical activity; Model 4: Model 3+ hormone replacement therapy clinical trial arm, dietary modification trial arm, smoking, alcohol intake, education and comorbidity; Model 5: Replace Model 4's Gail 5-year risk with the original variables: age, ethnicity, age at menarche, age at first full term birth, family history of breast cancer, and previous breast biopsy.

**Table S4.** Mammogram screening adherence of trial cohorts and included or non-compliance participants.

|                                                    | Included IBC< 1 yr<br>(N=324) | Non-compliance<br>(N=2,477) | P value           |
|----------------------------------------------------|-------------------------------|-----------------------------|-------------------|
| <b>Mean (SD) of BMI</b> continuous variable        | 28.09 (5.36)                  | 29.52 (5.96)                | <b>&lt;0.0001</b> |
| <b>Total number of mammograms</b> before diagnosis | 4.33 (2.62)                   | 6.17 (2.82)                 | <b>&lt;0.0001</b> |
| <b>HT Study group<sup>d</sup>, No. (%)</b>         |                               |                             | 0.0003            |
| Estrogen-alone intervention                        | 20 (6.17)                     | 126 (5.09)                  |                   |
| Estrogen-alone control                             | 21 (6.48)                     | 134 (5.41)                  |                   |
| Estrogen + progestin intervention                  | 57 (17.59)                    | 251 (10.13)                 |                   |
| Estrogen + progestin control                       | 33 (10.19)                    | 220 (8.88)                  |                   |
| Not randomized to HT                               | 193 (59.57)                   | 1746 (70.49)                |                   |
| <b>DM Trial group<sup>e</sup>, No. (%)</b>         |                               |                             | 0.003             |
| Intervention                                       | 92 (28.40)                    | 777 (31.37)                 |                   |
| Control                                            | 140 (43.21)                   | 1200 (48.45)                |                   |
| Not randomized to DM                               | 92 (28.40)                    | 500 (20.19)                 |                   |
